# Supplementary material
Source: publisher figshare collection journal article supplement (https://gsapubs.figshare.com/ndownloader/files/25999319)
Supplement: Supplementary file 1 [file 25999319]

## Sheet: S6 - CL of quartz
Supplemental Material for Ocampo-Díaz, Y.Z.E., Torres-Sánchez, S.A., Augustsson, C., Macías, J.L., Sosa-Ceballos, G., Cisneros-Máximo, G., García-Sánchez, L.,
Osorio-Ocampo, S., Avellan, D.R., Omma, J., Ortega-Obregón, C., Solari, L.A., and González-Barba, G., 2020, Provenance of the El Salto Formation (early Oligocene
to early Miocene), southern part of La Reforma caldera, Baja California Sur, Mexico, in Martens, U.C., and Molina Garza, R.S., eds., Southern and Central Mexico:
Basement Framework, Tectonic Evolution, and Provenance of Mesozoic–Cenozoic Basins: GSA Special Paper 546, p. 1–32, https://doi. org/10.1130/2020.2546(11).
	Table S6: CATHODOLUMINESCENCE OF QUARTZ (UNIVERSITY OF STAVANGER, NORWAY).
			Blue peak		Red peak		Trough		Background	Relatve intensities			Peak at 500-600 nm		Peak at ca. 700 nm
		Grain size	l	Intensity	l	Intensity	l	Intensity	Intensity	Blue peak	Red peak		l	Intensity	l	Intensity	Comments
		µm	nm	counts	nm	counts	nm	counts	counts				nm	counts	nm	counts
	Yaq-06-17 (sandstone)
	02-06-04	190	499	368	645	349	608	306	10	1.20946	1.14527
	02-06-05	100	507	426	646	342	614	319	10	1.34628	1.07443
	02-06-09	160	492	460	666	222	638	214	10	2.20588	1.03922				699	241
	02-06-14	100	488	460	623	257	597	272	10	1.71756	0.942748
	02-06-15	120	470	348	626	252	606	265	5	1.31923	0.95		528	373
	02-06-16	140	469	227	649	350	607	270	5	0.837736	1.30189		550	294
	02-06-17	150	471	178	641	230	586	210	5	0.843902	1.09756		569	216
	02-06-18	80	484	284	648	224	624	221	5	1.29167	1.01389		549	309	704	232
	02-06-19	200	499	548	638	243	622	262	10	2.13492	0.924603
	02-06-21	200	487	426	627	357	587	360	10	1.18857	0.991429		522	422
	02-06-22	120	493	309	648	205	614	196	5	1.59162	1.04712
	02-06-23	240	485	300	634	284	610	270	5	1.11321	1.05283		543	315
	02-06-25	140	486	340	638	240	619	234	10	1.47321	1.02679
	02-06-26	160	483	504	641	298	617	351	10	1.44868	0.844575		542	527
	02-06-27	200	487	405	636	266	606	266	10	1.54297	1
	02-06-28	180	477	226	645	271	611	242	5	0.932489	1.12236		558	274
	02-06-30	200	470	263	646	199	605	211	5	1.25243	0.941748		521	301
	02-06-31	160	499	402	657	185	621	200	10	2.06316	0.921053
	02-06-32	160	493	300	622	288	605	282	5	1.06498	1.02166		528	315
	02-06-34	100	473	305	641	216	615	217	5	1.41509	0.995283		536	350
	02-06-43	160	480	448	646	233	630	236	10	1.93805	0.986726		513	459	685	203
	02-06-46	160	482	388	643	275	622	277	10	1.41573	0.992509		541	446	697	219
	02-06-50	120	472	237	642	204	615	211	5	1.12621	0.966019		536	263
	02-06-51	160	490	219	633	205	600	189	5	1.16304	1.08696		548	231
	02-06-52	120	477	202	628	223	503	216	5	0.933649	1.03318		556	263
	02-06-53	100	483	319	641	144	620	179	5	1.8046	0.798851
	02-06-55	200	482	251	635	274	580	266	5	0.942529	1.03065		546	274
	02-06-56	160	486	389	649	152	613	183	10	2.19075	0.820809
	02-06-57	100	474	180	630	144	611	147	5	1.23239	0.978873		535	212
	02-06-58	160	486	172	641	151	605	142	5	1.21898	1.06569		533	192
	02-06-65	120	469	238	633	290	612	287	5	0.826241	1.01064		549	368
	02-06-66	160	464	362	640	214	610	263	10	1.3913	0.806324		530	431
	02-06-67	180	489	260	636	175	597	208	10	1.26263	0.833333		544	265
	Yaq-01-17 (sandstone)
	17-01-05	140	464	409	656	1075	499	458	10	0.890625	2.37723						Carbonate-affected? Optically dark blue
	17-01-07	200	465	702	633	433	582	389	15	1.8369	1.11765						Optically dark blue
	17-01-08	200	476	530	656	561	584	435	10	1.22353	1.29647
	17-01-09	180	485	449	646	572	556	421	10	1.06813	1.3674
	17-01-10	180	470	688	638	625	578	472	10	1.46753	1.33117
	17-01-11	220	470	770	641	564	611	523	20	1.49105	1.08151
	17-01-13	240	471	457	642	361	611	326	10	1.41456	1.11076		524	462
	17-01-14	200	490	287	653	404	541	259	10	1.11245	1.58233
	17-01-15	180	485	294	651	382	552	240	5	1.22979	1.60426
	17-01-16	160	479	542	642	394	588	333	10	1.64706	1.18885
	17-01-17	300	471	707	646	501	586	400	15	1.7974	1.26234
	17-01-19	160	475	265	651	443	539	223	10	1.19718	2.03286
	17-01-22	220	482	410	656	664	523	368	10	1.11732	1.82682		572	431
	17-01-23	220	469	547	646	706	567	367	10	1.5042	1.94958						Carbonate-affected?
	17-01-24	220	471	417	655	429	577	311	10	1.35216	1.39203
	17-01-25	220	473	711	640	359	600	358	15	2.02915	1.00292
	17-01-26	> 300	480	459	636	369	581	289	10	1.60932	1.28674
	17-01-27	240	471	738	624	355	597	366	15	2.05983	0.968661
	17-01-28	160	474	496	642	433	585	329	10	1.52351	1.32602
	17-01-29	220	472	510	647	458	591	364	10	1.41243	1.26554
	17-01-31	180	459	813	647	510	595	435	20	1.91084	1.18072
	17-01-32	> 300	464	803	645	416	592	352	20	2.35843	1.19277
	17-01-33	200	470	514	634	341	597	311	10	1.67442	1.09967
	17-01-34	> 300	477	515	638	268	590	278	10	1.88433	0.962687
	17-01-35	300	483	294	653	368	553	244	10	1.21368	1.52991						Carbonate-affected?
	17-01-36	180	469	567	627	398	587	350	10	1.63824	1.14118
	17-01-37	120	477	460	645	520	546	370	10	1.25	1.41667
	17-01-38	140	471	739	637	493	611	460	15	1.62697	1.07416
	17-01-39	200	471	800	648	654	586	569	20	1.42077	1.15483						Feldspar-affected?
	17-01-40	180	455	228	656	428	510	192	5	1.19251	2.26203
	17-01-41	200	479	457	638	250	608	255	10	1.82449	0.979592
	17-01-42	140	482	198	649	293	537	165	5	1.20625	1.8
	17-01-43	300	468	462	649	341	589	281	10	1.6679	1.2214						Carbonate-affected?
	17-01-44	140	474	496	651	444	579	340	10	1.47273	1.31515
	17-01-46	160	471	403	642	346	574	267	10	1.52918	1.30739
	17-01-47	120	488	315	640	313	573	266	10	1.19141	1.18359
	17-01-49	260	485	328	634	286	571	271	5	1.21429	1.05639
	17-01-50	240	488	360	639	279	598	248	10	1.47059	1.13025
	17-01-51	300	492	210	634	202	298	167	5	1.26543	1.21605
	Yaq-04-17 (sandstone)
	17-04-03	80	479	376	646	317	617	302	10	1.25342	1.05137		519	388			Glass-affected?
	17-04-05	100	483	295	649	354	572	263	10	1.12648	1.35968
	17-04-07	240	494	305	646	460	551	290	5	1.05263	1.59649		528	308
	17-04-10	100	479	350	643	344	593	270	10	1.30769	1.28462
	17-04-14	100	491	264	644	542	533	258	10	1.02419	2.14516
	17-04-18	100	485	493	633	491	581	398	15	1.24804	1.24282
	17-04-19	180	485	227	649	339	510	229	5	0.991071	1.49107		544	245
	17-04-20	120	478	462	653	323	605	300	10	1.55862	1.07931
	17-04-21	80	468	389	648	663	547	362	10	1.0767	1.85511						Carbonate-affected?
	17-04-22	120	484	425	649	626	547	389	10	1.09499	1.62533
	17-04-24	100	493	203	655	763	527	207	5	0.980198	3.75248						Carbonate-affected?
	17-04-25	> 300	473	598	642	377	592	304	15	2.0173	1.2526
	17-04-26	100	477	169	632	732	516	157	10	1.08163	4.91156						Carbonate-affected?
	17-04-27	120	481	590	650	860	546	519	15	1.14087	1.67659
	17-04-29	120	454	159	649	505	498	184	10	0.856322	2.84483		538	285
	17-04-30	100	489	230	656	522	508	218	10	1.05769	2.46154						Carbonate-affected?
	17-04-31	200	477	123	649	566	516	124	5	0.991597	4.71429						Carbonate-affected?
	17-04-32	80	476	440	637	601	491	430	10	1.02381	1.40714		554	500
	17-04-33	100	484	364	673	549	570	353	10	1.03207	1.57143
	17-04-35	80	476	293	651	568	523	293	10	1	1.97173						Carbonate-affected?
	17-04-36	120	468	353	639	574	494	359	10	0.982808	1.61605		540	507
	17-04-37	160	485	487	640	303	601	293	10	1.68551	1.03534
	17-04-38	120	488	296	648	590	527	291	10	1.01779	2.06406
	17-04-39	100	480	269	648	595	540	248	10	1.08824	2.45798
	17-04-40	200	480	268	649	914	527	257	10	1.04453	3.65992						Carbonate-affected?
	17-04-42	200	482	267	648	426	538	236	10	1.13717	1.84071
	17-04-44	80	462	118	653	600	497	115	5	1.02727	5.40909
	17-04-45	200	491	184	647	352	532	181	5	1.01705	1.97159						Carbonate-affected?
	17-04-46	200	471	988	642	1070	558	752	25	1.32462	1.43741						Measured at x20 + violet quartz
	17-04-47	140	477	315	645	531	539	271	10	1.16858	1.99617
	17-04-48	140	491	192	651	552	519	182	5	1.0565	3.0904
	17-04-49	140	488	224	648	734	534	213	10	1.05419	3.5665
	17-04-54	80	484	243	648	688	526	229	10	1.06393	3.09589
	17-04-56	120	468	187	646	403	481	183	5	1.02247	2.23596		537	259
	17-04-57	100	472	369	646	900	543	349	10	1.059	2.62537						Carbonate-affected?
	17-04-58	100	474	226	649	694	489	230	10	0.981818	3.10909		564	408
	17-04-59	100	482	403	646	454	554	386	10	1.04521	1.18085		528	415
	17-04-61	140	471	440	659	386	611	347	15	1.28012	1.11747		531	489
	17-04-62	120	495	289	644	597	521	292	10	0.989362	2.08156						Carbonate-affected?
	17-04-63	100	482	304	649	414	556	605	10	0.494118	0.678992		528	320	688	406
	Yaq-08-17 (sandstone)
	17-08 8-02	100	482	654	628	1188	531	623	15	1.05099	1.92928
	17-08 8-05	160	482	877	618	1299	548	896	20	0.978311	1.46005		521	905			Carbonate-affected?
	17-08 8-06	120	471	525	620	1155	500	590	15	0.886957	1.98261		539	764			Glass-affected?
	17-08 8-07	200	483	420	624	1711	524	411	10	1.02244	4.2419						Red quartz
	17-08 8-08	100	489	752	629	2170	542	688	20	1.09581	3.21856						Red quartz
	17-08 8-10	100	482	340	629	1633	521	332	10	1.02484	5.04037						Carbonate-affected?
	17-08 8-13	120	484	470	625	1801	519	488	15	0.961945	3.7759
	17-08 8-22	100	488	1579	622	5314	535	1471	45	1.07574	3.69495						Carbonate-affected?
	17-08 8-23	> 300	476	737	624	6949	524	692	30	1.06798	10.4517						Carbonate-affected?
	17-08 8-24	100	485	826	627	4941	520	807	25	1.0243	6.28645						Carbonate-affected?
	17-08 8-25	60	486	837	628	2385	524	802	20	1.04476	3.0243				680	2304	Carbonate-affected?
	17-08 8-27	100	465	458	619	2986	510	418	20	1.1005	7.45226						Carbonate-affected?
	17-08 8-28	120	475	857	626	3371	530	767	25	1.12129	4.50943						Carbonate-affected?
	17-08 8-29	60	465	414	625	2663	518	382	10	1.08602	7.13172						Carbonate-affected?
	17-08 8-32	80	478	635	614	2880	517	599	15	1.06164	4.90582				635	2849	Carbonate-affected?
	17-08 8-34	100	492	595	624	1259	534	578	10	1.02993	2.19894
	17-08 8-35	100	487	563	619	2292	529	572	15	0.983842	4.08797
	Yaq-46a (ignimbrite)
	46-02	100	477	472	645	549	561	390	10	1.21579	1.41842
	46-03	100	477	461	653	1457	538	437	15	1.05687	3.41706						Carbonate-affected?
	46-05	120	490	373	650	477	571	361	10	1.03419	1.33048		529	382
	46-06	300	468	739	647	468	595	410	20	1.84359	1.14872
	46-07	80	474	440	654	543	570	362	10	1.22159	1.5142
	46-09	140	474	174	662	886	533	180	5	0.965714	5.03429
	46-10	120	494	257	656	495	561	263	10	0.976285	1.917		522	271			Dark blue quartz
	46-12	140	452	122	654	548	477	126	5	0.966942	4.4876		335				Carbonate-affected?
	46-13	80	475	273	656	1079	509	282	10	0.966912	3.93015						Carbonate-affected?
	46-14	120	483	228	654	786	523	233	10	0.977578	3.47982						Carbonate-affected?
	46-15	80	474	383	654	945	541	350	10	1.09706	2.75
	46-16	100	455	259	651	655	487	274	10	0.943182	2.44318		552	388
	46-17	140	479	474	655	1371	514	456	15	1.04082	3.07483						Dark blue quartz
	46-21	110	483	338	654	765	539	312	10	1.08609	2.5
	46-22	100	457	148	658	688	474	152	10	0.971831	4.77465		567	529
	46-23	100	495	223	666	1017	541	227	10	0.981567	4.64055
	46-24	100	481	314	653	416	575	241	10	1.31602	1.75758
	46-25	120	476	337	655	877	546	302	10	1.11986	2.96918						Carbonate-affected?
	46-26	280	467	473	656	638	578	381	15	1.25137	1.70219
	46-28	120	479	405	659	810	548	347	10	1.17211	2.37389
	46-29	160	471	208	658	922	533	242	5	0.85654	3.8692						Carbonate-affected?
	46-30	100	489	167	660	538	536	158	5	1.05882	3.48366
	46-32	160	477	419	683	851	559	339	10	1.24316	2.55623
	46-33	120	482	227	660	661	539	201	10	1.13613	3.40838
	46-34	240	473	151	661	482	522	152	5	0.993197	3.2449
	46-36	180	473	191	652	419	497	178	5	1.07514	2.39306		539	198
	46-37	80	479	214	650	227	600	184	5	1.1676	1.24022		527	221
	46-38	160	479	140	657	394	495	143	5	0.978261	2.81884						Carbonate-affected?
	46-39	180	473	140	653	198	578	148	5	0.944056	1.34965		519	159
	46-40	120	480	265	660	536	542	266	10	0.996094	2.05469
	46-42	180	456	373	651	1799	483	398	15	0.934726	4.65796						Carbonate-affected?
	46-43	280	460	494	649	737	567	358	15	1.3965	2.10496
	SO0105 17-1 (rhyolite dike)
	17-1-06		473	322	633	185	601	170	10	1.95	1.09375				709	258
	SO0105 17-2 (rhyolite dike)
	17-2-D-04		484	436	659	477	570	325	10	1.35238	1.48254
	17-2-D-05		472	599	649	892	555	462	15	1.30649	1.96197
	SO2604 17-2 (granite)
	17-2-G-06		473	688	626	211	608	232	15	3.10138	0.903226				718	198
	17-2-G-07		484	307	635	126	614	125	5	2.51667	1.00833				722	118
	SO2604 17-3 (granite)
	17-3-02		475	256	649	174	603	154	5	1.68456	1.13423				717	193
	17-3-03		475	442	639	143	618	151	10	3.06383	0.943262				721	152
	17-3-04		473	241	637	147	613	135	5	1.81538	1.09231				717	176
	17-3-07		474	443	638	215	608	215	10	2.1122	1				713	217
	17-3-09		483	495	633	241	612	242	10	2.09052	0.99569				711	202
	17-3-10		478	478	618	276	603	261	10	1.86454	1.05976
	17-3-11		470	483	610	253	593	260	10	1.892	0.972				711	235
	17-3-12		474	711	648	221	614	258	15	2.8642	0.847737
	17-3-13		473	738	625	257	602	298	15	2.55477	0.855124				707	190
	17-3-15		475	305	645	184	621	189	5	1.63043	0.972826				710	160
	17-3-16		471	554	639	214	610	228	15	2.53052	0.934272				708	203
	SO2604 17-5 (granite)
	17-5-01		480	418	660	300	603	268	10	1.5814	1.12403
	17-5-06		487	302	629	221	611	206	10	1.4898	1.07653				710	278
	17-5-08		478	281	627	288	564	248	5	1.1358	1.16461				712	457
	17-5-13		478	296	665	204	603	186	5	1.60773	1.09945
	17-5-15		488	251	631	154	597	151	5	1.68493	1.02055				705	143
	17-5-17		477	279	638	196	611	184	5	1.53073	1.06704				705	273
	SO26 (granite)
	17-6-03		477	2088	622	637	590	887	40	2.41795	0.704841				723	351
	17-6-04		477	1919	630	547	618	589	35	3.40072	0.924188				710	332
	17-6-05		474	1893	633	503	609	616	35	3.19793	0.805508				715	379
	17-6-06		477	727	638	434	599	468	15	1.57174	0.924945
	17-6-19		474	561	624	286	604	292	10	1.9539	0.978723				694	294
	SO2604 17-9 (granite)
	17-9-03		460	727	649	308	622	304	10	2.43878	1.01361				715	364
	17-9-04		466	873	618	333	594	386	15	2.31267	0.857143				714	372
	17-9-07		463	448	627	248	609	242	5	1.8692	1.02532				720	199
	17-9-08		461	551	634	266	613	263	10	2.13834	1.01186				707	280
	17-9-09		477	659	644	350	626	325	10	2.06032	1.07937				717	481
	17-9-11		492	246	630	219	586	206	0	1.19417	1.06311		556	226
	17-9-16		471	601	635	332	614	301	10	2.03093	1.10653
	SO2804 17-10 (granite)
	17-10-02		480	409	631	232	603	213	10	1.96552	1.0936				707	224
	17-10-04		473	1294	620	368	613	399	25	3.39305	0.917112				721	226
	17-10-06		477	433	641	271	603	237	10	1.86344	1.14978				715	223
	17-10-08		468	924	594	411	580	442	20	2.14218	0.92654				716	323
	17-10-09		466	545	642	275	613	261	10	2.13147	1.05578				721	342
	17-10-10		469	514	631	277	610	270	10	1.93846	1.02692				719	383
	17-10-11		471	631	646	263	626	256	15	2.55602	1.02905				725	293
	17-10-12		469	531	649	231	611	255	10	2.12653	0.902041				721	187
	17-10-13		472	669	643	264	606	292	15	2.36101	0.898917				714	226
	17-10-14		475	610	633	249	618	255	15	2.47917	0.975				700	218
	17-10-16		494	393	636	271	605	274	10	1.45076	0.988636				713	241
	17-10-17		482	574	628	220	602	244	10	2.41026	0.897436				720	138
